# Supplementary material
Source: MDPI journal article supplement (https://www.mdpi.com/1424-2818/14/6/436)
Supplement: s1 [file s1]

Archive with 3 entries (3 files):
- Supp Figure S1.pdf
- Supplementary Table 1 Barcoded Samples for Diversity.xlsx
- Supplementary Table 2 Complete Species List and Accession Numbers.xlsx
