# Supplementary material
Source: MDPI journal article supplement (https://www.mdpi.com/1424-2818/14/6/436)
Supplement: s1 [file s1 › Supplementary Table 1 Barcoded Samples for Diversity.xlsx]

## Sheet: Lab Sheet
							Genbank Accession Numbers
Species	Sample ID	Institution	Institution ID	Family	Genus	Collectors	rbcL	trnH-psbA	matK	BOLD ID
Acacia attenuatta	600100001	USC	In process	Fabaceae	Acacia	K. Kupsch & G. Smyrell	ON594109			HPSCH001-22
Acacia baueri	600100002	USC	In process	Fabaceae	Acacia	R. Buchanan	ON594110			HPSCH002-22
Acacia cincinnata	600400424	BRI	1010072	Fabaceae	Acacia	H Pearl	ON594111	ON594400	ON614839	HPSCH229-22
Acacia complanata	600200004	USC	In process	Fabaceae	Acacia	K. Kupsch & G. Smyrell	ON594112	ON594401		HPSCH040-22
Acacia concurrens	600300605	BRI	1010088	Fabaceae	Acacia	H Pearl & A Moran	ON594113	ON594402	ON614840	HPSCH212-22
Acacia falcata	600300382	BRI	1010058	Fabaceae	Acacia	H Pearl & A Ward	ON594114	ON594403	ON614841	HPSCH187-22
Acacia hubbardiana	600400447	BRI	1010083	Fabaceae	Acacia	H Pearl	ON594115	ON594404	ON614842	HPSCH246-22
Acacia juncifolia	600400440	BRI	1010080	Fabaceae	Acacia	H Pearl & A Ward	ON594116	ON594405		HPSCH239-22
Acacia leiocalyx	600400504	USC	In process	Fabaceae	Acacia	H Pearl & A Ward	ON594117	ON594406	ON614843	HPSCH285-22
Acacia longissima	600200010	USC	In process	Fabaceae	Acacia	R. Buchanan	ON594118			HPSCH044-22
Acacia maidenii	600400491	USC	In process	Fabaceae	Acacia	H Pearl & A Ward	ON594119	ON594407	ON614844	HPSCH275-22
Acacia myrtifolia	600200229	USC	In process	Fabaceae	Acacia	H Pearl	ON594120	ON594408	ON614845	HPSCH079-22
Acacia oshanesii	600200011	USC	In process	Fabaceae	Acacia	M. Howard	ON594121			HPSCH045-22
Acacia suaveolens	600100004	USC	In process	Fabaceae	Acacia	K. Kupsch & G. Smyrell	ON594123	ON594410		HPSCH003-22
Acacia suaveolens	600200015	USC	In process	Fabaceae	Acacia	K. Kupsch & G. Smyrell	ON594122	ON594409	ON614846	HPSCH048-22
Acacia ulicifolia	600100005	USC	In process	Fabaceae	Acacia	R. Buchanan, P. Young	ON594124	ON594411		HPSCH004-22
Acrotriche aggregata	600300396	USC	In process	Ericaceae	Acrotriche	H Pearl & A Ward	ON594125	ON594412	ON614847	HPSCH194-22
Agiortia pedicellata	600300603	USC	In process	Ericaceae	Agiortia	H Pearl & A Ward	ON594126	ON594413	ON614848	HPSCH210-22
Allocasuarina emuina	600200219	USC	In process	Casuarinaceae	Allocasuarina	H Pearl & A Ward		ON594414	ON614849	HPSCH070-22
Allocasuarina thalassoscopica	600300395	BRI	1010064	Casuarinaceae	Allocasuarina	H Pearl & A Ward	ON594127	ON594415	ON614850	HPSCH193-22
Amyema bifurcata	600200263	USC	In process	Loranthaceae	Amyema	H Pearl & A Ward	ON594128	ON594416		HPSCH103-22
Amyema congener	600300326	USC	In process	Loranthaceae	Amyema	H Pearl	ON594129	ON594417		HPSCH159-22
Angophora woodsiana	600300517	USC	In process	Myrtaceae	Angophora	H Pearl	ON594130	ON594418	ON614851	HPSCH209-22
Aotus ericoides	600300313	BRI	1010048	Fabaceae	Aotus	H Pearl & A Moran	ON594132	ON594420		HPSCH148-22
Aotus lanigera	600300368	BRI	1010053	Fabaceae	Aotus	H Pearl & A Moran	ON594133	ON594421	ON614852	HPSCH179-22
Aristida benthamii	600400457	USC	In process	Poaceae	Aristida	H Pearl & A Moran	ON594134	ON594422	ON614853	HPSCH255-22
Aristida queenslandica	600300411	USC	In process	Poaceae	Aristida	H Pearl & A Moran	ON594135	ON594423	ON614854	HPSCH205-22
Aristida warburgii	600400532	USC	In process	Poaceae	Aristida	H Pearl & E Cameron	ON594136	ON594424	ON614855	HPSCH301-22
Astrotricha latifolia	600200007	USC	In process	Araliaceae	Astrotricha	K. Kupsch & G. Smyrell	ON594137	ON594425	ON614856	HPSCH042-22
Astrotricha longifolia	600400418	BRI	1010070	Araliaceae	Astrotricha	H Pearl & A Moran	ON594138	ON594426	ON614857	HPSCH225-22
Baeckea frutescens	600200246	USC	In process	Myrtaceae	Baeckea	H Pearl & A Ward	ON594139		ON614858	HPSCH093-22
Baeckea frutescens	600200271	USC	In process	Myrtaceae	Baeckea	H Pearl & A Ward	ON594140		ON614859	HPSCH110-22
Baeckea imbricata	600200273	USC	In process	Myrtaceae	Baeckea	H Pearl & A Ward	ON594141		ON614860	HPSCH112-22
Baloskion pallens	600200277	USC	In process	Restionaceae	Baloskion	H Pearl & A Ward	ON594142	ON594427		HPSCH115-22
Baloskion tenuiculme	600300288	USC	In process	Restionaceae	Baloskion	H Pearl & A Ward	ON594143	ON594428		HPSCH132-22
Baloskion tetraphyllum	600400472	USC	In process	Restionaceae	Baloskion	H Pearl & A Ward	ON594144	ON594429	ON614861	HPSCH266-22
Banksia oblongifolia	600200221	USC	In process	Proteaceae	Banksia	H Pearl & A Ward	ON594145	ON594430	ON614862	HPSCH072-22
Banksia spinulosa	600200233	USC	In process	Proteaceae	Banksia	H Pearl & A Ward	ON594146	ON594431	ON614863	HPSCH083-22
Bauera capitata	600400468	USC	In process	Cunoniaceae	Bauera	H Pearl & A Ward	ON594147	ON594432	ON614864	HPSCH264-22
Baumea articulata	600400452	USC	In process	Cyperaceae	Baumea	H Pearl	ON594148			HPSCH250-22
Baumea mulleri	600300317	USC	In process	Cyperaceae	Baumea	H Pearl & A Moran	ON594149			HPSCH151-22
Baumea rubiginosa	600400501	USC	In process	Cyperaceae	Baumea	H Pearl & A Moran	ON594150	ON594433		HPSCH282-22
Baumea teretifolia	600400455	USC	In process	Cyperaceae	Baumea	H Pearl & A Moran	ON594151	ON594434		HPSCH253-22
Billardiera scandens	600100009	USC	In process	Pittosporaceae	Billardiera	K. Kupsch & G. Smyrell	ON594152			HPSCH005-22
Blandfordia grandiflora	600300346	USC	In process	Blandfordiaceae	Blandfordia	H Pearl & A Ward	ON594153	ON594435	ON614865	HPSCH169-22
Boronia falcifolia	600300351	USC	In process	Rutaceae	Boronia	H Pearl & A Moran	ON594154	ON594436		HPSCH173-22
Boronia keysii	600400429	BRI	1010075	Rutaceae	Boronia	H Pearl	ON594155			HPSCH232-22
Boronia rivularis	600400428	BRI	1010074	Rutaceae	Boronia	H Pearl	ON594156			HPSCH231-22
Boronia rosmarinifolia	600400461	USC	In process	Rutaceae	Boronia	H Pearl & E Cameron	ON594157	ON594437	ON614866	HPSCH257-22
Bossiaea ensata	600200214	BRI	1010036	Fabaceae	Bossiaea	H Pearl & A Ward	ON594158	ON594438	ON614867	HPSCH067-22
Bossiaea heterophylla	600300310	BRI	1010046	Fabaceae	Bossiaea	H Pearl & A Moran	ON594159	ON594439	ON614868	HPSCH146-22
Brachyloma daphnoides	600200210	USC	In process	Ericaceae	Brachyloma	H Pearl & A Ward	ON594160	ON594440		HPSCH064-22
Brachyloma scortechinii	600100012	USC	In process	Ericaceae	Brachyloma	R. Buchanan, P. Young			ON614869	HPSCH006-22
Brachyloma scortechinii	600300372	USC	In process	Ericaceae	Brachyloma	H Pearl & A Moran	ON594161	ON594441		HPSCH182-22
Brunoniella australis	600300405	BRI	1010068	Acanthaceae	Brunoniella	H Pearl & A Moran	ON594162	ON594442	ON614870	HPSCH201-22
Burchardia umbellata	600400467	USC	In process	Colchicaceae	Burchardia	H Pearl & A Ward	ON594163	ON594443		HPSCH263-22
Caesia parviflora	600200021	USC	In process	Xanthorrhoeaceae	Caesia	K. Kupsch & G. Smyrell	ON594164	ON594444		HPSCH052-22
Calandrinia pickeringii	600400443	BRI	1010082	Montiaceae	Calandrinia	H Pearl	ON594165	ON594445	ON614871	HPSCH242-22
Calytrix tetragona	600300298	USC	In process	Myrtaceae	Calytrix	H Pearl & A Ward	ON594168	ON594447	ON614872	HPSCH138-22
Capillipedium spicigerum	600200023	USC	In process	Poaceae	Capillipedium	K. Kupsch & G. Smyrell	ON594169	ON594448		HPSCH054-22
Carex maculata	600200008	USC	In process	Cyperaceae	Carex	K. Kupsch & G. Smyrell	ON594170			HPSCH043-22
Cassytha filiformis	600400437	BRI	1010078	Lauraceae	Cassytha	H Pearl & A Ward	ON594171		ON614873	HPSCH237-22
Cassytha glabella	600300228	USC	In process	Lauraceae	Cassytha	H Pearl	ON594172	ON594449	ON614874	HPSCH122-22
Cassytha pubescens	600400463	USC	In process	Lauraceae	Cassytha	H Pearl & E Cameron	ON594173	ON594450		HPSCH259-22
Caustis blakei	600200260	USC	In process	Cyperaceae	Caustis	H Pearl & A Ward	ON594174	ON594451		HPSCH102-22
Caustis recurvata	600200240	USC	In process	Cyperaceae	Caustis	H Pearl & A Ward	ON594175	ON594452		HPSCH087-22
Chorizandra cymbaria	600200027	USC	In process	Cyperaceae	Chorizandra	K. Kupsch & G. Smyrell				HPSCH056-22
Chorizandra sphaerocephala	600400499	USC	In process	Cyperaceae	Chorizandra	H Pearl & A Moran	ON594176	ON594453		HPSCH280-22
Chorizema parviflorum	600400327	BRI	1010049	Fabaceae	Chorizema	H Pearl & A Moran	ON594177	ON594454		HPSCH215-22
Clerodendrum floribundum	600400488	USC	In process	Lamiaceae	Clerodendrum	H Pearl & A Ward	ON594178	ON594455	ON614875	HPSCH273-22
Coleocarya gracilis	600300250	USC	In process	Restionaceae	Coleocarya	H Pearl & A Ward	ON594179	ON594456		HPSCH124-22
Coleus graveolens	600300403	BRI	1010067	Lamiaceae	Coleus	H Pearl & A Moran	ON594335	ON594590	ON614978	HPSCH199-22
Comesperma defoliatum	600200270	USC	In process	Polygalaceae	Comesperma	H Pearl & A Ward	ON594180	ON594457	ON614876	HPSCH109-22
Comesperma ericinum	600100016	USC	In process	Polygalaceae	Comesperma	K. Kupsch & G. Smyrell	ON594181			HPSCH007-22
Comesperma hispidulum	600400600	USC	In process	Polygalaceae	Comesperma	G Smyrell				HPSCH303-22
Conospermum taxifolium	600100017	USC	In process	Proteaceae	Conospermum	R. Buchanan, P. Young	ON594182			HPSCH008-22
Conospermum taxifolium	600400454	USC	In process	Proteaceae	Conospermum	H Pearl	ON594183		ON614877	HPSCH252-22
Corymbia intermedia	600300264	USC	In process	Myrtaceae	Corymbia	H Pearl & A Ward	ON594184	ON594458	ON614878	HPSCH126-22
Corymbia trachyphloia	600300297	BRI	1010044	Myrtaceae	Corymbia	H Pearl & A Ward	ON594185	ON594459	ON614879	HPSCH137-22
Cyanthillium cinereum	600400490	USC	In process	Asteraceae	Cyanthillium	H Pearl	ON594186	ON594460	ON614880	HPSCH274-22
Cyathochaeta diandra	600400389	USC	In process	Cyperaceae	Cyathochaeta	H Pearl	ON594187	ON594461		HPSCH219-22
Dampiera stricta	600400436	BRI	1010077	Goodeniaceae	Dampiera	H Pearl & A Ward	ON594188	ON594462	ON614881	HPSCH236-22
Daviesia umbellulata	600100019	USC	In process	Fabaceae	Daviesia	K. Kupsch & G. Smyrell	ON594189	ON594463		HPSCH009-22
Daviesia wyattiana	600300381	BRI	1010057	Fabaceae	Daviesia	H Pearl & A Ward	ON594190	ON594464	ON614882	HPSCH186-22
Desmodium gunnii	600400492	USC	In process	Fabaceae	Desmodium	H Pearl & A Ward	ON594344	ON594599	ON614982	HPSCH276-22
Dianella longifolia	600200017	USC	In process	Xanthorrhoeaceae	Dianella	K. Kupsch & G. Smyrell	ON594192	ON594465	ON614883	HPSCH050-22
Dianella nervosa	600200257	USC	In process	Xanthorrhoeaceae	Dianella	H Pearl & A Ward	ON594193	ON594466	ON614884	HPSCH101-22
Dianella rara	600300397	USC	In process	Xanthorrhoeaceae	Dianella	H Pearl & A Moran	ON594194	ON594467		HPSCH195-22
Dianella revoluta	600300295	USC	In process	Xanthorrhoeaceae	Dianella	H Pearl & A Moran	ON594195	ON594468	ON614885	HPSCH135-22
Dianella sp 600400408	600400408	USC	In process	Cyperaceae	Dianella	H Pearl	ON594224	ON594496	ON614908	HPSCH222-22
Digitaria diminuta	600300410	USC	In process	Poaceae	Digitaria	H Pearl & A Moran	604[0n]	ON594469	ON614886	HPSCH204-22
Dillwynia floribunda	600100021	USC	In process	Fabaceae	Dillwynia	R. Buchanan, P. Young	ON594196	ON594470		HPSCH010-22
Dillwynia retorta	600100022	USC	In process	Fabaceae	Dillwynia	R. Buchanan, P. Young	ON594197	ON594471	ON614887	HPSCH011-22
Dioscorea transversa	600400495	USC	In process	Dioscoreaceae	Dioscorea	H Pearl & A Ward	ON594198	ON594472	ON614888	HPSCH278-22
Diplatia furcata	600300343	USC	In process	Loranthaceae	Diplatia	H Pearl		ON594473		HPSCH305-22
Dodonaea triquetra	600100023	USC	In process	Sapindaceae	Dodonaea	K. Kupsch & G. Smyrell	ON594199	ON594474	ON614889	HPSCH012-22
Drosera binata	600400478	BRI	1010085	Droseraceae	Drosera	H Pearl	ON594200		ON614890	HPSCH267-22
Drosera pygmaea	600400294	USC	In process	Droseraceae	Drosera	H Pearl	ON594201			HPSCH214-22
Drosera spatulata	600400427	BRI	1010073	Droseraceae	Drosera	H Pearl	ON594202			HPSCH230-22
Elaeocarpus reticulatus	600400469	USC	In process	Elaeocarpaceae	Elaeocarpus	H Pearl & A Ward	ON594203	ON594475	ON614891	HPSCH265-22
Empodisma minus	600200276	USC	In process	Restionaceae	Empodisma	H Pearl & A Ward	ON594204	ON594476		HPSCH114-22
Entolasia marginata	600400456	USC	In process	Poaceae	Entolasia	H Pearl	ON594205	ON594477		HPSCH254-22
Entolasia stricta	600100026	USC	In process	Poaceae	Entolasia	K. Kupsch & G. Smyrell	ON594206	ON594478		HPSCH013-22
Entolasia stricta	600300333	USC	In process	Poaceae	Entolasia	H Pearl				HPSCH163-22
Epacris obtusifolia	600300308	USC	In process	Ericaceae	Epacris	H Pearl & A Ward	ON594207	ON594479	ON614892	HPSCH145-22
Epacris pulchella	600400445	USC	In process	Ericaceae	Epacris	H Pearl	ON594208	ON594480	ON614893	HPSCH244-22
Eragrostis brownii	600300300	USC	In process	Poaceae	Eragrostis	H Pearl & A Ward	ON594209	ON594481	ON614894	HPSCH139-22
Eremochloa bimaculata	600400530	USC	In process	Poaceae	Eremochloa	H Pearl	ON594210	ON594482		HPSCH300-22
Eriachne glabrata	600300296	USC	In process	Poaceae	Eriachne	H Pearl & A Moran	ON594211	ON594483	ON614895	HPSCH136-22
Eriachne pallescens	600400453	USC	In process	Poaceae	Eriachne	H Pearl	ON594212	ON594484	ON614896	HPSCH251-22
Eriostemon australasius	600400417	BRI	1010069	Rutaceae	Eriostemon	H Pearl		ON594485	ON614897	HPSCH224-22
Eucalyptus bancroftii	600200230	USC	In process	Myrtaceae	Eucalyptus	H Pearl	ON594213	ON594486	ON614898	HPSCH080-22
Eucalyptus carnea	600300401	USC	In process	Myrtaceae	Eucalyptus	H Pearl & A Moran	ON594214	ON594487	ON614899	HPSCH197-22
Eucalyptus exserta	600300311	BRI	1010047	Myrtaceae	Eucalyptus	H Pearl	ON594215	ON594488	ON614900	HPSCH147-22
Eucalyptus kabiana	600400421	USC	In process	Myrtaceae	Eucalyptus	H Pearl	ON594216	ON594489	ON614901	HPSCH227-22
Eucalyptus latisinensis	600300328	BRI	1010050	Myrtaceae	Eucalyptus	H Pearl & A Ward	ON594217	ON594490	ON614902	HPSCH160-22
Eucalyptus racemosa	600200005	USC	In process	Myrtaceae	Eucalyptus	K. Kupsch & G. Smyrell	ON594218	ON594491	ON614903	HPSCH041-22
Eucalyptus resinifera x tereticornis	600400513	USC	In process	Myrtaceae	Eucalyptus	H Pearl	ON594219	ON594492	ON614904	HPSCH291-22
Eucalyptus robusta x Eucalyptus tereticornis	600300324	USC	In process	Myrtaceae	Eucalyptus	H Pearl & A Moran	ON594220		ON614905	HPSCH157-22
Eucalyptus tereticornis	600400503	USC	In process	Myrtaceae	Eucalyptus	H Pearl	ON594221	ON594493	ON614906	HPSCH284-22
Eurychorda complanata	600200254	USC	In process	Restionaceae	Eurychorda	H Pearl & A Ward	ON594222	ON594494	ON614907	HPSCH099-22
Fimbristylis pauciflora	600100029	USC	In process	Cyperaceae	Fimbristylis	M. Howard	ON594223	ON594495		HPSCH014-22
Gahnia clarkei	600100030	USC	In process	Cyperaceae	Gahnia	K. Kupsch & G. Smyrell	ON594225			HPSCH015-22
Gahnia sieberiana	600400516	USC	In process	Cyperaceae	Gahnia	H Pearl	ON594226	ON594497		HPSCH293-22
Geitonoplesium cymosum	600100031	USC	In process	Philesiaceae	Geitonoplesium	K. Kupsch & G. Smyrell	ON594227	ON594498	ON614909	HPSCH016-22
Glycine clandestina	600100032	USC	In process	Fabaceae	Glycine	K. Kupsch & G. Smyrell	ON594228			HPSCH017-22
Glycine clandestina	600400493	USC	In process	Fabaceae	Glycine	H Pearl		ON594499	ON614910	HPSCH277-22
Gompholobium pinnatum	600100080	USC	In process	Fabaceae	Gompholobium	K. Kupsch & G. Smyrell	ON594229			HPSCH032-22
Gompholobium pinnatum	600300383	BRI	1010059	Fabaceae	Gompholobium	H Pearl & A Ward		ON594500	ON614911	HPSCH188-22
Gompholobium virgatum	600300369	BRI	1010054	Fabaceae	Gompholobium	H Pearl & A Moran	ON594230	ON594501	ON614912	HPSCH180-22
Gonocarpus chinensis	600200030	USC	In process	Haloragaceae	Gonocarpus	K. Kupsch & G. Smyrell				HPSCH058-22
Gonocarpus chinensis	600400444	USC	In process	Haloragaceae	Gonocarpus	H Pearl	ON594231	ON594502		HPSCH243-22
Gonocarpus effusus	600300420	BRI	1010071	Haloragaceae	Gonocarpus	H Pearl & A Pearl	ON594232	ON594503		HPSCH207-22
Gonocarpus humilis	600400529	USC	In process	Haloragaceae	Gonocarpus	H Pearl	ON594233	ON594504		HPSCH299-22
Gonocarpus teucrioides	600200026	USC	In process	Haloragaceae	Gonocarpus	K. Kupsch & G. Smyrell	ON594234			HPSCH055-22
Goodenia bellidifolia	600300412	USC	In process	Goodeniaceae	Goodenia	H Pearl & A Ward	ON594235	ON594505	ON614913	HPSCH206-22
Goodenia rotundifolia	600300402	BRI	1010066	Goodeniaceae	Goodenia	H Pearl & A Moran	ON594236	ON594506	ON614914	HPSCH198-22
Goodenia stelligera	600200205	USC	In process	Goodeniaceae	Goodenia	H Pearl	ON594237	ON594507	ON614915	HPSCH061-22
Grevillea reptans	600300321	USC	In process	Proteaceae	Grevillea	H Pearl & A Moran	ON594238	ON594508		HPSCH154-22
Haemodorum tenuifolium	600300322	USC	In process	Haemodoraceae	Haemodorum	H Pearl & A Moran	ON594239	ON594509	ON614916	HPSCH155-22
Hakea actites	600300362	USC	In process	Proteaceae	Hakea	H Pearl & A Moran	ON594240	ON594510		HPSCH178-22
Hakea benthamii	600300329	USC	In process	Proteaceae	Hakea	H Pearl & A Ward	ON594241	ON594511	ON614917	HPSCH161-22
Hakea florulenta	600300386	USC	In process	Proteaceae	Hakea	H Pearl & A Moran	ON594242	ON594512		HPSCH190-22
Hardenbergia violacea	600300379	USC	In process	Fabaceae	Hardenbergia	H Pearl & A Ward	ON594243	ON594513	ON614918	HPSCH184-22
Hibbertia acicularis	600400462	USC	In process	Dilleniaceae	Hibbertia	H Pearl	ON594244	ON594514	ON614919	HPSCH258-22
Hibbertia aspera	600100040	USC	In process	Dilleniaceae	Hibbertia	K. Kupsch & G. Smyrell	ON594245			HPSCH018-22
Hibbertia linearis	600100041	USC	In process	Dilleniaceae	Hibbertia	R. Buchanan, P. Young	ON594247			HPSCH019-22
Hibbertia linearis	600200227	USC	In process	Dilleniaceae	Hibbertia	H Pearl	ON594246		ON614920	HPSCH078-22
Hibbertia linearis	600200251	USC	In process	Dilleniaceae	Hibbertia	H Pearl & A Ward	ON594248	ON594515		HPSCH097-22
Hibbertia salicifolia	600200275	USC	In process	Dilleniaceae	Hibbertia	H Pearl & A Ward	ON594249	ON594516		HPSCH113-22
Hibbertia scandens	600400506	USC	In process	Dilleniaceae	Hibbertia	H Pearl	ON594250	ON594517		HPSCH286-22
Hibbertia stricta	600200238	USC	In process	Dilleniaceae	Hibbertia	H Pearl & A Ward	ON594251		ON614921	HPSCH085-22
Hibbertia vestita	600300385	USC	In process	Dilleniaceae	Hibbertia	H Pearl & A Moran	ON594252		ON614922	HPSCH189-22
Homoranthus virgatus	600100043	USC	In process	Myrtaceae	Homoranthus	R. Buchanan, P. Young	ON594253			HPSCH020-22
Homoranthus virgatus	600300262	USC	In process	Myrtaceae	Homoranthus	H Pearl & A Ward			ON614923	HPSCH125-22
Hovea acutifolia	600200001	USC	In process	Fabaceae	Hovea	K. Kupsch & G. Smyrell	ON594254	ON594518		HPSCH039-22
Hoya australis	600400487	USC	In process	Apocynaceae	Hoya	H Pearl	ON594255	ON594519	ON614924	HPSCH272-22
Hybanthus monopetalus	600100044	USC	In process	Violaceae	Hybanthus	K. Kupsch & G. Smyrell	ON594331			HPSCH021-22
Hypolaena fastigiata	600200247	USC	In process	Restionaceae	Hypolaena	H Pearl & A Ward	ON594256	ON594520		HPSCH094-22
Imperata cylindrica	600400518	USC	In process	Poaceae	Imperata	H Pearl	ON594257	ON594521		HPSCH294-22
Ischaemum australe	600300318	USC	In process	Poaceae	Ischaemum	H Pearl & A Moran	ON594258	ON594522		HPSCH152-22
Jacksonia stackhousei	600300325	USC	In process	Fabaceae	Jacksonia	H Pearl & A Ward	ON594259	ON594523	ON614925	HPSCH158-22
Juncus usitatus	600400497	USC	In process	Juncaceae	Juncus	H Pearl	ON594260	ON594524	ON614926	HPSCH279-22
Laxmannia compacta	600200239	USC	In process	Asparagaceae	Laxmannia	H Pearl & A Ward	ON594261	ON594525	ON614927	HPSCH086-22
Lepidosperma laterale	600400391	BRI	1010062	Cyperaceae	Lepidosperma	H Pearl		ON594526		HPSCH220-22
Lepidosperma longitudinale	600300315	USC	In process	Cyperaceae	Lepidosperma	H Pearl & A Moran	ON594262	ON594527		HPSCH150-22
Lepidosperma quadrangulatum	600400515	USC	In process	Cyperaceae	Lepidosperma	H Pearl	ON594263	ON594528		HPSCH292-22
Lepironia articulata	600400465	USC	In process	Cyperaceae	Lepironia	H Pearl	ON594264			HPSCH261-22
Leptocarpus tenax	600200226	USC	In process	Restionaceae	Leptocarpus	H Pearl	ON594265	ON594529		HPSCH077-22
Leptomeria acida	600400419	USC	In process	Amphorogynaceae	Leptomeria	H Pearl	ON594266	ON594530	ON614928	HPSCH226-22
Leptospermum juniperinum	600300302	BRI	1010045	Myrtaceae	Leptospermum	H Pearl	ON594267	ON594531	ON614929	HPSCH141-22
Leptospermum leuhmanii	600200267	USC	In process	Myrtaceae	Leptospermum	H Pearl	ON594268	ON594532	ON614930	HPSCH106-22
Leptospermum liversidgei	600100048	USC	In process	Myrtaceae	Leptospermum	M. Howard	ON594269	ON594533		HPSCH022-22
Leptospermum microcarpum	600200223	USC	In process	Myrtaceae	Leptospermum	H Pearl & A Ward	ON594270	ON594534		HPSCH074-22
Leptospermum polygalifolium	600200272	USC	In process	Myrtaceae	Leptospermum	H Pearl & A Ward	ON594271	ON594535	ON614931	HPSCH111-22
Leptospermum semibaccatum	600200212	USC	In process	Myrtaceae	Leptospermum	H Pearl & A Ward	ON594272	ON594536	ON614932	HPSCH065-22
Leptospermum speciosum	600200243	USC	In process	Myrtaceae	Leptospermum	H Pearl & A Ward	ON594273	ON594537	ON614933	HPSCH090-22
Leptospermum trinervium	600400466	USC	In process	Myrtaceae	Leptospermum	H Pearl	ON594274	ON594538	ON614934	HPSCH262-22
Leptospermum whitei	600200253	BRI	1010040	Myrtaceae	Leptospermum	H Pearl & A Ward	ON594275	ON594539	ON614935	HPSCH098-22
Lepyrodia imitans	600300338	USC	In process	Restionaceae	Lepyrodia	H Pearl	ON594276	ON594540	ON614936	HPSCH165-22
Lepyrodia scariosa	600300330	USC	In process	Restionaceae	Lepyrodia	H Pearl & A Ward	ON594277	ON594541	ON614937	HPSCH162-22
Leucopogon deformis	600300371	USC	In process	Ericaceae	Leucopogon	H Pearl & A Moran	ON594278	ON594542	ON614938	HPSCH181-22
Leucopogon ericoides	600200249	USC	In process	Ericaceae	Leucopogon	H Pearl & A Ward	ON594279	ON594543		HPSCH096-22
Leucopogon juniperinus	600200016	USC	In process	Ericaceae	Leucopogon	K. Kupsch & G. Smyrell		ON594544		HPSCH049-22
Leucopogon juniperinus	600400400	USC	In process	Ericaceae	Leucopogon	H Pearl			ON614939	HPSCH221-22
Leucopogon pimeleoides	600300353	USC	In process	Ericaceae	Leucopogon	H Pearl & A Moran	ON594280	ON594545	ON614940	HPSCH175-22
Leucopogon rupicola	600300407	USC	In process	Ericaceae	Leucopogon	H Pearl & A Moran	ON594281	ON594546	ON614941	HPSCH203-22
Leucopogon virgatus	600300290	USC	In process	Ericaceae	Leucopogon	H Pearl	ON594282	ON594547	ON614942	HPSCH133-22
Liparophyllum exaltatum	600300345	USC	In process	Menyanthaceae	Liparophyllum	H Pearl & A Moran	ON594283	ON594548	ON614943	HPSCH168-22
Lobelia anceps	600200281	USC	In process	Campanulaceae	Lobelia	H Pearl & A Ward	ON594284	ON594549		HPSCH119-22
Lobelia purpurascens	600400520	USC	In process	Campanulaceae	Lobelia	H Pearl	ON594286	ON594550		HPSCH296-22
Logania albiflora	600300406	USC	In process	Loganiaceae	Logania	H Pearl & A Moran	ON594287	ON594551	ON614944	HPSCH202-22
Lomandra confertifolia	600200022	USC	In process	Asparagaceae	Lomandra	K. Kupsch & G. Smyrell	ON594288	ON594552	ON614945	HPSCH053-22
Lomandra confertifolia	600200269	USC	In process	Asparagaceae	Lomandra	H Pearl	ON594289	ON594553	ON614946	HPSCH108-22
Lomandra elongata	600200213	USC	In process	Asparagaceae	Lomandra	H Pearl & A Ward	ON594290	ON594554		HPSCH066-22
Lomandra filiformis	600400527	USC	In process	Asparagaceae	Lomandra	H Pearl	ON594291	ON594555	ON614947	HPSCH298-22
Lomandra longifolia	600300344	USC	In process	Asparagaceae	Lomandra	H Pearl	ON594292	ON594556	ON614948	HPSCH167-22
Lomandra multiflora	600100050	USC	In process	Asparagaceae	Lomandra	K. Kupsch & G. Smyrell	ON594293	ON594557	ON614949	HPSCH023-22
Lomatia silaifolia	600100051	USC	In process	Proteaceae	Lomatia	K. Kupsch & G. Smyrell	ON594294			HPSCH024-22
Lophostemon confertus	600400507	USC	In process	Myrtaceae	Lophostemon	H Pearl	ON594295		ON614950	HPSCH287-22
Lophostemon suaveolens	600300303	USC	In process	Myrtaceae	Lophostemon	H Pearl	ON594296		ON614951	HPSCH142-22
Ludwigia octovalis	600100053	USC	In process	Onagraceae	Ludwigia	M. Howard	ON594298			HPSCH025-22
Macarthuria complanata	600300349	USC	In process	Limeaceae	Macarthuria	H Pearl & A Ward	ON594299	ON594559	ON614952	HPSCH171-22
Marsdenia fraseri	600400441	USC	In process	Apocynaceae	Marsdenia	H Pearl & S. Harker	ON594300	ON594560	ON614953	HPSCH240-22
Melaleuca nodosa	600200248	BRI	1010039	Myrtaceae	Melaleuca	H Pearl & A Ward	ON594301	ON594561	ON614954	HPSCH095-22
Melaleuca pachyphylla	600400450	USC	In process	Myrtaceae	Melaleuca	H Pearl	ON594302	ON594562	ON614955	HPSCH249-22
Melaleuca sieberi	600400481	USC	In process	Myrtaceae	Melaleuca	H Pearl	ON594303	ON594563	ON614968	HPSCH268-22
Melaleuca thymifolia	600200225	BRI	1010037	Myrtaceae	Melaleuca	H Pearl	ON594304	ON594564	ON614956	HPSCH076-22
Micraira subulifolia	600300422	USC	In process	Poaceae	Micraira	H Pearl	ON594305	ON594565	ON614957	HPSCH208-22
Micrantheum ericoides	600300335	USC	In process	Picrodendraceae	Micrantheum	H Pearl	ON594306	ON594566		HPSCH164-22
Micromyrtus littoralis	600300347	USC	In process	Myrtaceae	Micromyrtus	H Pearl & A Ward	ON594307	ON594567	ON614958	HPSCH170-22
Mirbelia rubiifolia	600100093	USC	In process	Fabaceae	Mirbelia	K. Kupsch & G. Smyrell	ON594308			HPSCH038-22
Mirbelia rubiifolia	600300359	BRI	1010051	Fabaceae	Mirbelia	H Pearl & A Moran		ON594568		HPSCH177-22
Mistletoe species	600400512	USC	In process	Loranthaceae		H Pearl	ON594297	ON594558		HPSCH290-22
Mitrasacme alsinoides	600200012	USC	In process	Loganiaceae	Mitrasacme	M. Howard	ON594309	ON594569		HPSCH046-22
Mitrasacme paludosa	600300319	USC	In process	Loganiaceae	Mitrasacme	H Pearl & A Moran	ON594310	ON594570	ON614959	HPSCH153-22
Monotoca scoparia	600300217	USC	In process	Ericaceae	Monotoca	H Pearl	ON594311			HPSCH121-22
Notelaea ovata	600100058	USC	In process	Oleaceae	Notelaea	K. Kupsch & G. Smyrell	ON594312			HPSCH026-22
Notelaea ovata	600300380	BRI	1010056	Oleaceae	Notelaea	H Pearl & A Ward		ON594571	ON614960	HPSCH185-22
Ochrosperma lineare	600100060	USC	In process	Myrtaceae	Ochrosperma	R. Buchanan, P. Young	ON594313			HPSCH027-22
Ochrosperma lineare	600300355	USC	In process	Myrtaceae	Ochrosperma	H Pearl & A Moran		ON594572	ON614961	HPSCH176-22
Olax retusa	600300285	USC	In process	Erythropalaceae	Olax	H Pearl & A Ward	ON594314	ON594573	ON614962	HPSCH129-22
Oplismenus imbecillus	600100061	USC	In process	Poaceae	Oplismenus	K. Kupsch & G. Smyrell	ON594315			HPSCH028-22
Panicum effusum	600400602	USC	In process	Poaceae	Panicum	H Pearl	ON594316	ON594574		HPSCH304-22
Panicum simile	600400500	USC	In process	Poaceae	Panicum	H Pearl	ON594317	ON594575	ON614963	HPSCH281-22
Paspalidium distans	600300340	USC	In process	Poaceae	Paspalidium	H Pearl	ON594318	ON594576		HPSCH166-22
Paspalidium gracile	600400423	USC	In process	Poaceae	Paspalidium	H Pearl	ON594319	ON594577	ON614964	HPSCH228-22
Patersonia fragilis	600300304	USC	In process	Iridaceae	Patersonia	H Pearl & A Ward	ON594320	ON594578	ON614965	HPSCH143-22
Patersonia glabrata	600300390	BRI	1010061	Iridaceae	Patersonia	H Pearl & A Ward	ON594321	ON594579	ON614966	HPSCH191-22
Patersonia sericea	600300378	BRI	1010055	Iridaceae	Patersonia	H Pearl & A Moran	ON594322	ON594580	ON614967	HPSCH183-22
Persoonia sericea	600400485	USC	In process	Proteaceae	Persoonia	H Pearl	ON594323		ON614968	HPSCH270-22
Persoonia stradbrokensis	600200232	USC	In process	Proteaceae	Persoonia	H Pearl & A Ward	ON594324	ON594581	ON614969	HPSCH082-22
Persoonia tenuifolia	600400434	USC	In process	Proteaceae	Persoonia	H Pearl	ON594325		ON614970	HPSCH234-22
Petrophile shirleyae	600100065	USC	In process	Proteaceae	Petrophile	K. Kupsch & G. Smyrell	ON594326			HPSCH029-22
Petrophile shirleyae	600300393	BRI	1010063	Proteaceae	Petrophile	H Pearl & A Ward		ON594582	ON614971	HPSCH192-22
Philotheca difformis	600300282	USC	In process	Rutaceae	Philotheca	H Pearl & A Ward	ON594327	ON594583	ON614972	HPSCH127-22
Philotheca queenslandica	600100066	USC	In process	Rutaceae	Philotheca	M. Howard	ON594328			HPSCH030-22
Philotheca queenslandica	600400448	USC	In process	Rutaceae	Philotheca	H Pearl		ON594584	ON614973	HPSCH247-22
Philydrum lanuginosum	600200278	USC	In process	Philydraceae	Philydrum	H Pearl & A Ward			ON614974	HPSCH116-22
Phyllanthus hirtellus	600400442	BRI	1010081	Phyllanthaceae	Phyllanthus	H Pearl	ON594329	ON594585		HPSCH241-22
Phyllota phylicoides	600200245	BRI	1010038	Fabaceae	Phyllota	H Pearl & A Ward	ON594330	ON594586	ON614975	HPSCH092-22
Pimelea linifolia	600400435	BRI	1010076	Thymelaeaceae	Pimelea	H Pearl	ON594332	ON594587	ON614976	HPSCH235-22
Platylobium formosum	600400486	USC	In process	Fabaceae	Platylobium	H Pearl	ON594333	ON594588	ON614977	HPSCH271-22
Platysace ericoides	600200209	USC	In process	Apiaceae	Platysace	H Pearl & A Ward	ON594334	ON594589		HPSCH063-22
Podolobium ilicifolium	600400484	USC	In process	Fabaceae	Podolobium	H Pearl	ON594336	ON594591		HPSCH269-22
Pomaderris argyrophylla	600300404	USC	In process	Fabaceae	Pomaderris	H Pearl & A Moran	ON594337	ON594592	ON614979	HPSCH200-22
Pomax umbellata	600400439	BRI	1010079	Rubiaceae	Pomax	H Pearl	ON594338	ON594593	ON614980	HPSCH238-22
Pseudanthus ligulatus	600200268	USC	In process	Picrodendraceae	Pseudanthus	H Pearl	ON594340	ON594595		HPSCH107-22
Pseudanthus orientalis	600300604	USC	In process	Picrodendraceae	Pseudanthus	H Pearl & A Ward	ON594341	ON594596		HPSCH211-22
Psychotria loniceroides	600200244	USC	In process	Rubiaceae	Psychotria	H Pearl & A Ward	ON594342	ON594597		HPSCH091-22
Ptilothrix deusta	600400446	USC	In process	Cyperaceae	Ptilothrix	H Pearl	ON594343	ON594598		HPSCH245-22
Pultenaea retusa	600200020	USC	In process	Fabaceae	Pultenaea	K. Kupsch & G. Smyrell		ON594600		HPSCH051-22
Pultenaea robusta	600300286	BRI	1010043	Fabaceae	Pultenaea	H Pearl & A Ward	ON594345	ON594601	ON614983	HPSCH130-22
Pultenaea villosa	600400360	BRI	1010052	Fabaceae	Pultenaea	H Pearl	ON594346	ON594602	ON614984	HPSCH216-22
Rhynchospora rubra	600400502	USC	In process	Cyperaceae	Rhynchospora	H Pearl	ON594347			HPSCH283-22
Ricinocarpos pinifolius	600300350	USC	In process	Euphorbiaceae	Ricinocarpos	H Pearl & A Moran	ON594348			HPSCH172-22
Rutidosis murchisonii	600200224	USC	In process	Asteraceae	Rutidosis	H Pearl & A Ward	ON594349	ON594603		HPSCH075-22
Schoenus apogon	600400292	USC	In process	Cyperaceae	Schoenus	H Pearl	ON594350	ON594604		HPSCH213-22
Schoenus brevifolius	600200242	USC	In process	Cyperaceae	Schoenus	H Pearl & A Ward	ON594351	ON594605		HPSCH089-22
Schoenus calostachyus	600200255	USC	In process	Cyperaceae	Schoenus	H Pearl & A Ward	ON594352			HPSCH100-22
Schoenus lepidosperma	600400376	USC	In process	Cyperaceae	Schoenus	H Pearl	ON594353	ON594606		HPSCH218-22
Schoenus ornithopodioides	600200215	USC	In process	Cyperaceae	Schoenus	H Pearl & A Ward	ON594354	ON594607		HPSCH068-22
Schoenus paludosa	600300293	USC	In process	Cyperaceae	Schoenus	H Pearl	ON594131	ON594419		HPSCH134-22
Schoenus scabripes	600300314	USC	In process	Cyperaceae	Schoenus	H Pearl & A Moran	ON594355	ON594608		HPSCH149-22
Schoenus sparteus	600400433	USC	In process	Cyperaceae	Schoenus	H Pearl	ON594356	ON594609		HPSCH233-22
Schoenus vaginatus	600300301	USC	In process	Cyperaceae	Schoenus	H Pearl & A Ward	ON594357	ON594610		HPSCH140-22
Scleria sphacelata	600100076	USC	In process	Cyperaceae	Scleria	K. Kupsch & G. Smyrell	ON594358			HPSCH031-22
Smilax glyciphylla	600200032	USC	In process	Smilacaceae	Smilax	K. Kupsch & G. Smyrell				HPSCH060-22
Sowerbaea juncea	600300204	USC	In process	Asparagaceae	Sowerbaea	H Pearl	ON594359	ON594611		HPSCH120-22
Sporadanthus caudatus	600100091	USC	In process	Restionaceae	Sporadanthus	K. Kupsch & G. Smyrell	ON594360			HPSCH036-22
Sporadanthus caudatus	600300307	USC	In process	Restionaceae	Sporadanthus	H Pearl & A Ward		ON594612	ON614985	HPSCH144-22
Sporadanthus interruptus	600200241	USC	In process	Restionaceae	Sporadanthus	H Pearl & A Ward	ON594361	ON594613	ON614986	HPSCH088-22
Sprengelia sprengelioides	600300352	USC	In process	Ericaceae	Sprengelia	H Pearl & A Moran	ON594362	ON594614		HPSCH174-22
Stackhousia nuda	600300287	USC	In process	Celastraceae	Stackhousia	H Pearl & A Ward	ON594363	ON594615	ON614987	HPSCH131-22
Strangea linearis	600200013	USC	In process	Proteaceae	Strangea	R. Buchanan	ON594364	ON594616		HPSCH047-22
Stylidium graminifolium	600400522	BRI	1010087	Stylidiaceae	Stylidium	H Pearl	ON594365	ON594617		HPSCH297-22
Stylidium ornatum	600300323	USC	In process	Stylidiaceae	Stylidium	H Pearl & A Moran	ON594366	ON594618	ON614988	HPSCH156-22
Styphelia viridis	600100085	USC	In process	Ericaceae	Styphelia	R. Buchanan, P. Young	ON594367	ON594619		HPSCH034-22
Tetratheca thymifolia	600400415	USC	In process	Elaeocarpaceae	Tetratheca	H Pearl	ON594368			HPSCH223-22
Themeda triandra	600200206	USC	In process	Poaceae	Themeda	H Pearl	ON594369	ON594620		HPSCH062-22
Thysanotus tuberosus	600300235	USC	In process	Asparagaceae	Thysanotus	H Pearl & A Ward	ON594370	ON594621	ON614989	HPSCH123-22
Trachymene incisa	600100082	USC	In process	Araliaceae	Trachymene	M. Howard	ON594371			HPSCH033-22
Trachymene incisa	600400458	USC	In process	Araliaceae	Trachymene	H Pearl		ON594622	ON614990	HPSCH256-22
Tricoryne elatior	600400449	BRI	1010084	Xanthorrhoeaceae	Tricoryne	H Pearl	ON594372			HPSCH248-22
Triplarina volcanica	600300284	USC	In process	Myrtaceae	Triplarina	H Pearl & A Ward	0			HPSCH128-22
Tripogon loliiformis	600400510	USC	In process	Poaceae	Tripogon	H Pearl	ON594373	ON594623		HPSCH288-22
Utricularia lateriflora	600400519	BRI	1010086	Lentibulariaceae	Utricularia	H Pearl	ON594374	ON594624		HPSCH295-22
Velleia spathulata	600400464	USC	In process	Goodeniaceae	Velleia	H Pearl	ON594375	ON594625	ON614991	HPSCH260-22
Viminaria juncea	600400533	USC	In process	Fabaceae	Viminaria	H Pearl	ON594376	ON594626	ON614992	HPSCH302-22
Westringia tenuicaulis	600200220	USC	In process	Lamiaceae	Westringia	H Pearl & A Ward	ON594377	ON594627	ON614993	HPSCH071-22
Woollsia pungens	600100092	USC	In process	Ericaceae	Woollsia	R. Buchanan, P. Young	ON594378	ON594628		HPSCH037-22
Xanthorrhoea fulva	600200222	USC	In process	Xanthorrhoeaceae	Xanthorrhoea	H Pearl & A Ward	ON594379	ON594629	ON614994	HPSCH073-22
Xanthorrhoea johnsonii	600200218	USC	In process	Xanthorrhoeaceae	Xanthorrhoea	H Pearl & A Ward	ON594380		ON614995	HPSCH069-22
Xanthorrhoea latifolia	600400511	USC	In process	Xanthorrhoeaceae	Xanthorrhoea	H Pearl	ON594381	ON594630	ON614996	HPSCH289-22
Xanthosia pilosa	600300398	BRI	1010065	Apiaceae	Xanthosia	H Pearl & A Moran	ON594383	ON594632	ON614997	HPSCH196-22
Xyris complanata	600200279	USC	In process	Xyridaceae	Xyris	H Pearl & A Ward	ON594384			HPSCH117-22
Xyris juncea	600200237	USC	In process	Xyridaceae	Xyris	H Pearl & A Ward	ON594385			HPSCH084-22
Xyris juncea	600200274	USC	In process	Xyridaceae	Xyris	H Pearl		ON594633		HPSCH306-22
Zieria laxiflora	600100088	USC	In process	Rutaceae	Zieria	K. Kupsch & G. Smyrell	ON594386	ON594634		HPSCH035-22
