# Supplementary material
Source: MDPI journal article supplement (https://www.mdpi.com/1424-2818/14/6/436)
Supplement: s1 [file s1 › Supplementary Table 2 Complete Species List and Accession Numbers.xlsx]

## Sheet: Sheet1
SPECIES	SPECIES	rbcL	trnH-psbA	matK
Acacia_attenuatta	Acacia attenuatta	ON594109	KC284015
Acacia_baueri	Acacia baueri	ON594110	KF048568
Acacia_cincinnata	Acacia cincinnata	ON594111	ON594400	ON614839
Acacia_complanata	Acacia complanata	ON594112	ON594401
Acacia_concurrens	Acacia concurrens	ON594113	ON594402	ON614840
Acacia_disparrima	Acacia disparrima		MHFRI028*	KM894481
Acacia_falcata	Acacia falcata	ON594114	ON594403	ON614841
Acacia_flavescens	Acacia flavescens	MHFRI002*	MHFRI002*	MHFRI002*
Acacia_hubbardiana	Acacia hubbardiana	ON594115	ON594404	ON614842
Acacia_juncifolia	Acacia juncifolia	ON594116	ON594405
Acacia_leiocalyx	Acacia leiocalyx	ON594117	ON594406	ON614843
Acacia_sophorae	Acacia sophorae	FJ716635	FJ808515	FJ711519
Acacia_longissima	Acacia longissima	ON594118
Acacia_maidenii	Acacia maidenii	ON594119	ON594407	ON614844
Acacia_myrtifolia	Acacia myrtifolia	ON594120	ON594408	ON614845
Acacia_oshanesii	Acacia oshanesii	ON594121	KM895329	KM894869
Acacia_penninervis	Acacia penninervis		KC284508	AF274159
Acacia_suaveolens	Acacia suaveolens	ON594123	ON594410	ON614846
Acacia_ulicifolia	Acacia ulicifolia	ON594124	ON594411
Acronychia_imperforata	Acronychia imperforata	KM896092	MHFRI003*	MHFRI003*
Acrotriche_aggregata	Acrotriche aggregata	ON594125	ON594412	ON614847
Agiortia_pedicellata	Agiortia pedicellata	ON594126	ON594413	ON614848
Allocasuarina_emuina	Allocasuarina emuina		ON594414	ON614849
Allocasuarina_littoralis	Allocasuarina littoralis	MHFRI004*	MHFRI004*	MHFRI004*
Allocasuarina_thalassoscopica	Allocasuarina thalassoscopica	ON594127	ON594415	ON614850
Alloteropsis_semialata	Alloteropsis semialata	AM849345		HE574026
Alphitonia_excelsa	Alphitonia excelsa	KM896142	MHFRI005*	MHFRI005*
Amperea_xiphoclada	Amperea xiphoclada	AY794911		LK021378
Amyema_bifurcata	Amyema bifurcata	ON594128	ON594416
Amyema_congener	Amyema congener	ON594129	ON594417
Angophora_woodsiana	Angophora woodsiana	ON594130	ON594418	ON614851
Aotus_ericoides	Aotus ericoides	ON594132	ON594420	AY386884
Aotus_lanigera	Aotus lanigera	ON594133	ON594421	ON614852
Aristida_benthamii	Aristida benthamii	ON594134	ON594422	ON614853
Aristida_queenslandica	Aristida queenslandica	ON594135	ON594423	ON614854
Aristida_vagans	Aristida vagans	HE573355		HE573952
Aristida_warburgii	Aristida warburgii	ON594136	ON594424	ON614855
Arundinella_montana	Arundinella montana	LN907890		LN906655
Astrotricha_latifolia	Astrotricha latifolia	ON594137	ON594425	ON614856
Astrotricha_longifolia	Astrotricha longifolia	ON594138	ON594426	ON614857
Austromyrtus_dulcis	Austromyrtus dulcis	MHFRI006*	MHFRI006*	MHFRI006*
Baeckea_frutescens	Baeckea frutescens	ON594140	MH069879	ON614859
Baeckea_imbricata	Baeckea imbricata	ON594141		ON614860
Baloskion_pallens	Baloskion pallens	ON594142	ON594427
Baloskion_tenuiculme	Baloskion tenuiculme	ON594143	ON594428
Baloskion_tetraphyllum	Baloskion tetraphyllum	ON594144	ON594429	ON614861
Banksia_aemula	Banksia aemula	MHFRI008*	MHFRI008*	MHFRI008*
Banksia_integrifolia	Banksia integrifolia	MHFRI007*	MHFRI007*	MHFRI007*
Banksia_oblongifolia	Banksia oblongifolia	ON594145	ON594430	ON614862
Banksia_robur	Banksia robur	MHFRI009*	MHFRI009*	MHFRI009*
Banksia_serrata	Banksia serrata		AF482025	AY823169
Banksia_conferta	Banksia conferta		AF482069	EU169611
Banksia_spinulosa	Banksia spinulosa	ON594146	ON594431	ON614863
Bauera_capitata	Bauera capitata	ON594147	ON594432	ON614864
Baumea_articulata	Baumea articulata	AM999787	ON594433
Baumea_mulleri	Baumea mulleri	ON594149	ON594434
Baumea_teretifolia	Baumea teretifolia	ON594151	ON594434
Baumea_rubiginosa	Baumea rubiginosa	ON594150	ON594433
Bertya_shapeana	Bertya shapeana	AB267935		AB268039
Billardiera_scandens	Billardiera scandens	ON594152		SHU58625
Blandfordia_grandiflora	Blandfordia grandiflora	ON594153	ON594435	ON614865
Boronia_falcifolia	Boronia falcifolia	ON594154	ON594436
Boronia_keysii	Boronia keysii	ON594155	MHFRI010*	MHFRI010*
Boronia_rivularis	Boronia rivularis	ON594156	MHFRI010*	MHFRI010*
Boronia_rosmarinifolia	Boronia rosmarinifolia	ON594157	ON594437	ON614866
Bossiaea_ensata	Bossiaea ensata	ON594158	ON594438	ON614867
Bossiaea_heterophylla	Bossiaea heterophylla	ON594159	ON594439	ON614868
Brachyloma_daphnoides	Brachyloma daphnoides	ON594160	ON594440	AF015633
Brachyloma_scortechinii	Brachyloma scortechinii	ON594161	ON594441	ON614869
Brunoniella_australis	Brunoniella australis	ON594162	ON594442	ON614870
Buchnera_urticifolia	Buchnera urticifolia	JQ593060		JQ588562
Burchardia_umbellata	Burchardia umbellata	ON594163	ON594443	KU304036
Burmannia_disticha	Burmannia disticha	AF307485		KU127429
Caesia_parviflora	Caesia parviflora	ON594164	ON594444
Calandrinia_pickeringii	Calandrinia pickeringii	ON594165	ON594445	ON614871
Calytrix_tetragona	Calytrix tetragona	ON594168	ON594447	ON614872
Capillipedium_spicigerum	Capillipedium spicigerum	ON594169	ON594448
Carex_maculata	Carex maculata	JX644641		HG915872
Carpobrotus_glaucescens	Carpobrotus glaucescens	HM849868		JQ024942
Cassytha_filiformis	Cassytha filiformis	ON594171	AF261996	ON614873
Cassytha_glabella	Cassytha glabella	ON594172	ON594449	ON614874
Cassytha_pubescens	Cassytha pubescens	ON594173	ON594450	AJ627921
Caustis_blakei	Caustis blakei	ON594174	ON594451
Caustis_recurvata	Caustis recurvata	ON594175	ON594452
Centrolepis_strigosa	Centrolepis strigosa	AF148766		DQ257507
Chorizandra_sphaerocephala	Chorizandra sphaerocephala	ON594176	ON594453
Chorizema_parviflorum	Chorizema parviflorum	ON594177	ON594454
Chrysopogon_sylvaticus	Chrysopogon sylvaticus	MF998293		MF998956
Cladium_procerum	Cladium procerum	JN892612		JN895377
Clerodendrum_floribundum	Clerodendrum floribundum	ON594178	ON594455	ON614875
Coleocarya_gracilis	Coleocarya gracilis	ON594179	ON594456	GQ409023
Coleus_graveolens	Coleus graveolens	ON594335	ON594590	ON614978
Comesperma_defoliatum	Comesperma defoliatum	ON594180	ON594457
Comesperma_hispidulum	Comesperma hispidulum	ON594181
Commelina_lanceolata	Commelina lanceolata	MH549792	MH621845	MH552284
Commersonia_fraseri	Commersonia fraseri	KM895847		KM894706
Conospermum_taxifolium	Conospermum taxifolium	ON594182		ON614877
Corymbia_gummifera	Corymbia gummifera		KT632098	KT632662
Corymbia_intermedia	Corymbia intermedia	ON594184	ON594458	ON614878
Corymbia_trachyphloia	Corymbia trachyphloia	ON594185	ON594459	ON614879
Cupaniopsis_anacardioides	Cupaniopsis anacardioides	GU135199	GU135366	GU135037
Curculigo_ensifolia	Curculigo ensifolia	MK105742		MK248616
Cyanthillium_cinereum	Cyanthillium cinereum	ON594186	ON594460	ON614880
Cyathochaeta_diandra	Cyathochaeta diandra	ON594187	ON594461
Cyclophyllum_coprosmoides	Cyclophyllum coprosmoides	KM895699		KM894590
Cymbopogon_refractus	Cymbopogon refractus	KT309057	KT309049	KT309065
Cyperus_exaltatus	Cyperus exaltatus	MF065477	KX405796	KX369499
Cyperus_polystachyos	Cyperus polystachyos	MF065478	KX405796	KX369499
Dampiera_stricta	Dampiera stricta	ON594188	ON594462	ON614881
Daviesia_umbellulata	Daviesia umbellulata	ON594189	ON594463
Daviesia_wyattiana	Daviesia wyattiana	ON594190	ON594464	ON614882
Desmodium_gunnii	Desmodium gunnii	ON594344	ON594599	ON614982
Dianella_caerulea	Dianella caerulea		MHFRI011*	MHFRI011*
Dianella_longifolia	Dianella longifolia	ON594192	ON594465	ON614883
Dianella_nervosa	Dianella nervosa	ON594193	ON594466	ON614884
Dianella_rara	Dianella rara	ON594194	ON594467
Dianella_revoluta	Dianella revoluta	ON594195	ON594468	ON614885
Dianella_sp_600400408	Dianella sp 600400408	ON594224	ON594496	ON614908
Dichelachne_montana	Dichelachne montana	HE573309		HE574411
Digitaria_diminuta	Digitaria diminuta		ON594469	ON614886
Digitaria_parviflora	Digitaria parviflora	HE573375		HE574068
Dillwynia_floribunda	Dillwynia floribunda	ON594196	ON594470
Dillwynia_glabberina	Dillwynia glabberina	ON594197	ON594471	KX792904
Dillwynia_retorta	Dillwynia retorta	ON594197	ON594471	ON614887
Dioscorea_transversa	Dioscorea transversa	ON594198	ON594472	ON614888
Diplatia_furcata	Diplatia furcata		ON594473	EU544425
Dodonaea_triquetra	Dodonaea triquetra	ON594199	ON594474	ON614889
Dodonaea_viscosa	Dodonaea viscosa	KJ082273	KJ426704	KJ426704
Drosera_binata	Drosera binata	ON594200		ON614890
Drosera_burmannii	Drosera burmannii	KY296097		KY296097
Drosera_peltata	Drosera peltata	KT794002		KY296098
Drosera_pygmaea	Drosera pygmaea	ON594201		KY952401
Drosera_spathulata	Drosera spathulata	ON594202		KY952402
Duboisia_myoporoides	Duboisia myoporoides	KM895686		KM894576
Durringtonia_paludosa	Durringtonia paludosa	MK141487		ON614980
Eclipta_prostrata	Eclipta prostrata	LC461823	LC461824	LC461822
Elaeocarpus_reticulatus	Elaeocarpus reticulatus	ON594203	ON594475	ON614891
Empodisma_minus	Empodisma minus	ON594204	ON594476	JX129080
Entolasia_marginata	Entolasia marginata	ON594205	ON594477	HE574417
Entolasia_stricta	Entolasia stricta	ON594206	ON594478	HE574069
Epacris_microphylla	Epacris microphylla	MHFRI012*	MHFRI012*
Epacris_obtusifolia	Epacris obtusifolia	ON594207	ON594479	ON614892
Epacris_pulchella	Epacris pulchella	ON594208	ON594480	ON614893
Eragrostic_brownii	Eragrostic brownii	ON594209	ON594481	ON614894
Eremochloa_bimaculata	Eremochloa bimaculata	ON594210	ON594482
Eremophila_debilis	Eremophila debilis	MF828465		MF828481
Eriachne_glabrata	Eriachne glabrata	ON594211	ON594483	ON614895
Eriachne_pallescens	Eriachne pallescens	ON594212	ON594484	ON614896
Eriocaulon_australe	Eriocaulon australe	LC485812		LC485678
Eriocaulon_scariosum	Eriocaulon scariosum	LC485914		LC485752
Eriostemon_australasius	Eriostemon australasius	JN987099	ON594485	ON614897
Eucalyptus_bancroftii	Eucalyptus bancroftii	ON594213	ON594486	ON614898
Eucalyptus_carnea	Eucalyptus carnea	ON594214	ON594487	ON614899
Eucalyptus_exserta	Eucalyptus exserta	ON594215	ON594488	ON614900
Eucalyptus_kabiana	Eucalyptus kabiana	ON594216	ON594489	ON614901
Eucalyptus_latisinensis	Eucalyptus latisinensis	ON594217	ON594490	ON614902
Eucalyptus_racemosa	Eucalyptus racemosa	ON594218	ON594491	ON614903
Eucalyptus_resinifera	Eucalyptus resinifera		KT632513	KT633102
Eucalyptus_robusta	Eucalyptus robusta	ON594219	ON594492	ON614904
Eucalyptus_robustaXtereticornis	Eucalyptus robustaXtereticornis	ON594220		ON614905
Eucalyptus_seeana	Eucalyptus seeana		KT632540	KT633127
Eucalyptus_siderophloia	Eucalyptus siderophloia	ON594221		MHFRI013*
Eucalyptus_tereticornis	Eucalyptus tereticornis	ON594221	ON594493	ON614906
Eurychorda_complanata	Eurychorda complanata	ON594222	ON594494	ON614907
Eustrephus_latifolius	Eustrephus latifolius	AY298831		JQ435554
Exocarpos_cupressiformis	Exocarpos cupressiformis	MHFRI014*	MHFRI014*	MHFRI014*
Fimbristylis_dichotoma	Fimbristylis dichotoma	MN623749		KX036924
Fimbristylis_pauciflora	Fimbristylis pauciflora	ON594223	ON594495
Fuirena_umbellata	Fuirena umbellata	JQ591247		JQ587361
Gahnia_aspera	Gahnia aspera	ON594226	ON594497
Gahnia_clarkei	Gahnia clarkei	ON594225	ON594497
Gahnia_sieberiana	Gahnia sieberiana	ON594226	ON594497
Geitonoplesium_cymosum	Geitonoplesium cymosum	ON594227	ON594498	ON614909
Glochidion_ferdinandi	Glochidion ferdinandi	KM89597	KM895379	KM894806
Glycine_clandestina	Glycine clandestina	ON594228	ON594499	ON614910
Glycine_tabacina	Glycine tabacina	U74197	ON594499	KP769180
Gompholobium_pinnatum	Gompholobium pinnatum	ON594229	ON594500	ON614911
Gompholobium_virgatum	Gompholobium virgatum	ON594230	ON594501	ON614912
Gonocarpus_chinensis	Gonocarpus chinensis	ON594231	ON594502	KC988290
Gonocarpus_effusus	Gonocarpus effusus	ON594232	ON594503
Gonocarpus_humilis	Gonocarpus humilis	ON594233	ON594504	EF179037
Gonocarpus_micranthus	Gonocarpus micranthus	ON594231	ON594502	EF179045
Goodenia_bellidifolia	Goodenia bellidifolia	ON594235	ON594505	ON614913
Goodenia_rotundifolia	Goodenia rotundifolia	ON594236	ON594506	ON614914
Goodenia_stelligera	Goodenia stelligera	ON594237	ON594507	ON614915
Grevillea_reptans	Grevillea reptans	ON594238	ON594508
Gynochthodes_jasminoides	Gynochthodes jasminoides	KM895725	KM895145	KM894613
Haemodorum_austroqueenslandicum	Haemodorum austroqueenslandicum	ON594239		EU499275
Haemodorum_tenuifolium	Haemodorum tenuifolium	ON594239	ON594509	ON614916
Hakea_actites	Hakea actites	ON594240	ON594510
Hakea_benthamii	Hakea benthamii	ON594241	ON594511	ON614917
Hakea_florulenta	Hakea florulenta	ON594242	ON594512
Hardenbergia_violacea	Hardenbergia violacea	ON594243	ON594513	ON614918
Hibbertia_acicularis	Hibbertia acicularis	ON594244	ON594514	ON614919
Hibbertia_aspera	Hibbertia aspera	ON594245		ON614920
Hibbertia_fasciculata	Hibbertia fasciculata	FJ860373		ON614920
Hibbertia_linearis	Hibbertia linearis	ON594248	ON594515
Hibbertia_salicifolia	Hibbertia salicifolia	ON594249	ON594516
Hibbertia_scandens	Hibbertia scandens	ON594250	ON594517	KT869267
Hibbertia_stricta	Hibbertia stricta	ON594251		ON614921
Hibbertia_vestita	Hibbertia vestita	ON594252		ON614922
Hibiscus_splendens	Hibiscus splendens	KM895602		KM894510
Homoranthus_virgatus	Homoranthus virgatus	ON594253		ON614923
Hovea_acutifolia	Hovea acutifolia	ON594254	ON594518	KM894688
Hoya_australis	Hoya australis	ON594255	ON594519	ON614924
Hybanthus_monopetalus	Hybanthus monopetalus	ON594331		MK290517
Hypericum_gramineum	Hypericum gramineum	GQ436683	GQ435379
Hypolaena_fastigiata	Hypolaena fastigiata	ON594256	ON594520
Hypoxis_pratensis	Hypoxis pratensis	HM459566
Imperata_cylindrica	Imperata cylindrica	ON594257	ON594521	EF137462
Ischaemum_australe	Ischaemum australe	ON594258	ON594522
Jacksonia_scoparia	Jacksonia scoparia	MHFRI015*	MHFRI015*	MHFRI015*
Jacksonia_stackhousei	Jacksonia stackhousei	ON594259	ON594523	ON614925
Juncus_continuus	Juncus continuus	ON594260	ON594524	ON614926
Laxmannia_compacta	Laxmannia compacta	ON594261	ON594525	ON614927
Leersia_hexandra	Leersia hexandra	MF998443		MF999100
Lepidosperma_laterale	Lepidosperma laterale		ON594526	LT900078
Lepidosperma_longitudinale	Lepidosperma longitudinale	ON594262	ON594527
Lepidosperma_quadrangulatum	Lepidosperma quadrangulatum	ON594263	ON594528
Lepironia_articulata	Lepironia articulata	ON594264		FR832787
Leptocarpus_tenax	Leptocarpus tenax	ON594265	ON594529	GQ409039
Leptomeria_acida	Leptomeria acida	ON594266	ON594530	ON614928
Leptospermum_juniperinum	Leptospermum juniperinum	ON594267	ON594531	ON614929
Leptospermum_leuhmanii	Leptospermum leuhmanii	ON594268	ON594532	ON614930
Leptospermum_liversidgei	Leptospermum liversidgei	ON594269	ON594533	AF184729
Leptospermum_microcarpum	Leptospermum microcarpum	ON594270	ON594534
Leptospermum_petersonii	Leptospermum petersonii	JN676919		KM065127
Leptospermum_polygalifolium	Leptospermum polygalifolium	ON594271	ON594535	ON614931
Leptospermum_semibaccatum	Leptospermum semibaccatum	ON594272	ON594536	ON614932
Leptospermum_speciosum	Leptospermum speciosum	ON594273	ON594537	ON614933
Leptospermum_trinervium	Leptospermum trinervium	ON594274	ON594538	ON614934
Leptospermum_whitei	Leptospermum whitei	ON594275	ON594539	ON614935
Lepyrodia_imitans	Lepyrodia imitans	ON594276	ON594540	ON614936
Lepyrodia_scariosa	Lepyrodia scariosa	ON594277	ON594541	ON614937
Leucopogon_deformis	Leucopogon deformis	ON594278	ON594542	ON614938
Leucopogon_ericoides	Leucopogon ericoides	ON594279	ON594543	AY372637
Leucopogon_juniperinus	Leucopogon juniperinus	JQ667342	ON594544	ON614939
Leucopogon_leptospermoides	Leucopogon leptospermoides	MHFRI016*	MHFRI016*	MHFRI016*
Leucopogon_margarodes	Leucopogon margarodes	MHFRI026*	MHFRI017*	MHFRI017*
Leucopogon_parviflorus	Leucopogon parviflorus	JQ305870	JQ310805
Leucopogon_pimeleoides	Leucopogon pimeleoides	ON594280	ON594545	ON614940
Leucopogon_rupicola	Leucopogon rupicola	ON594281	ON594546	ON614941
Leucopogon_virgatus	Leucopogon virgatus	ON594282	ON594547	ON614942
Liparophyllum_exaltatum	Liparophyllum exaltatum	ON594283	ON594548	ON614943
Lobelia_anceps	Lobelia anceps	ON594284	ON594549
Lobelia_purpurascens	Lobelia purpurascens	ON594286	ON594550
Logania_albiflora	Logania albiflora	ON594287	ON594551	ON614944
Lomandra_confertifolia	Lomandra confertifolia	ON594288	ON594552	ON614945
Lomandra_confertifolia	Lomandra confertifolia	ON594289	ON594553	ON614946
Lomandra_elongata	Lomandra elongata	ON594290	ON594554
Lomandra_filiformis	Lomandra filiformis	ON594291	ON594555	ON614947
Lomandra_longifolia	Lomandra longifolia	ON594292	ON594556	ON614948
Lomandra_multiflora	Lomandra multiflora	ON594293	ON594557	ON614949
Lomatia_silaifolia	Lomatia silaifolia	ON594294	KT006123	EU169644
Lophostemon_confertus	Lophostemon confertus	ON594295	KM895042	ON614950
Lophostemon_suaveolens	Lophostemon suaveolens	ON594296	KM895061	ON614951
Ludwigia_octovalvis	Ludwigia octovalvis	MG934775	JX100572	MG934844
Macarthuria_complanata	Macarthuria complanata	ON594299	ON594559	ON614952
Macarthuria_neocambrica	Macarthuria neocambrica	FN825766		ON614952
Marsdenia_fraseri	Marsdenia fraseri	ON594300	ON594560	ON614953
Melaleuca_nodosa	Melaleuca nodosa	ON594301	ON594561	ON614954
Melaleuca_pachyphylla	Melaleuca pachyphylla	ON594302	ON594562	ON614955
Melaleuca_quinquenervia	Melaleuca quinquenervia	MHFRI018*	MHFRI018*	MHFRI018*
Melaleuca_sieberi	Melaleuca sieberi	ON594303	ON594563	ON614968
Melaleuca_thymifolia	Melaleuca thymifolia	ON594304	ON594564	ON614956
Melaleuca_viridiflora	Melaleuca viridiflora		EU410242	AF184708
Melastoma_malabathricum	Melastoma malabathricum	MHFRI019*	MH069943
Melichrus_procumbens	Melichrus procumbens	JQ667440	JQ310809	JQ667189
Micraira_subulifolia	Micraira subulifolia	ON594305	ON594565	ON614957
Micrantheum_ericoides	Micrantheum ericoides	ON594306	ON594566
Microlaena_stipoides	Microlaena stipoides	KX290941		KX290987
Micromyrtus_littoralis	Micromyrtus littoralis	ON594307	ON594567	ON614958
Mirbelia_rubifolia	Mirbelia rubifolia	ON594308	ON594568
Mistletoe_speciesX	Mistletoe species	ON594297	ON594558
Mitrasacme_alsinoides	Mitrasacme alsinoides	ON594309	ON594569
Mitrasacme_paludosa	Mitrasacme paludosa	ON594310	ON594570	ON614959
Monotoca_scoparia	Monotoca scoparia	ON594311		AF015640
Monotoca_sp_Fraser Island	Monotoca sp Fraser Island	MHFRI020*	MHFRI020*
Murdannia_graminea	Murdannia graminea	KJ773694		KJ772954
Notelaea_ovata	Notelaea ovata	ON594312	ON594571	ON614960
Nymphoides_exiliflora	Nymphoides exiliflora	EF173102		EF173072
Ochrosperma_lineare	Ochrosperma lineare	ON594313	ON594572	ON614961
Olax_retusa	Olax retusa	ON594314	ON594573	ON614962
Panicum_effusum	Panicum effusum	ON594316	ON594574
Panicum_simile	Panicum simile	ON594317	ON594575	ON614963
Parsonsia_straminea	Parsonsia straminea	MHFRI021*	MHFRI021*	KM894808
Paspalidium_distans	Paspalidium distans	ON594318	ON594576
Paspalidium_gracile	Paspalidium gracile	ON594319	ON594577	ON614964
Patersonia_fragilis	Patersonia fragilis	ON594320	ON594578	ON614965
Patersonia_glabrata	Patersonia glabrata	ON594321	ON594579	ON614966
Patersonia_sericea	Patersonia sericea	ON594322	ON594580	ON614967
Persoonia_sericea	Persoonia sericea	ON594323		ON614968
Persoonia_stradbrokensis	Persoonia stradbrokensis	ON594324	ON594581	ON614969
Persoonia_tenuifolia	Persoonia tenuifolia	ON594325		ON614970
Persoonia_virgata	Persoonia virgata	MHFRI022*	MHFRI022*	MHFRI022*
Petrophile_shirleyae	Petrophile shirleyae	ON594326	ON594582	ON614971
Phebalium_woombye	Phebalium woombye	MHFRI024*	MHFRI024*
Philotheca _difformis	Philotheca difformis	ON594327	ON594583	ON614972
Philotheca_queenslandica	Philotheca queenslandica	ON594328	ON594584	ON614973
Philydrum_lanuginosum	Philydrum lanuginosum	LC050452		ON614974
Phyllanthus_hirtellus	Phyllanthus hirtellus	ON594329	ON594585
Phyllota_phylicoides	Phyllota phylicoides	ON594330	ON594586	ON614975
Pimelea_linifolia	Pimelea linifolia	ON594332	ON594587	ON614976
Platylobium_formosum	Platylobium formosum	ON594333	ON594588	ON614977
Platysace_ericoides	Platysace ericoides	ON594334	ON594589
Platysace_lanceolata	Platysace lanceolata	AY188434		GQ983657
Platysace_linearifolia	Platysace linearifolia		MHFRI025*	MHFRI025*
Podolobium_ilicifolium	Podolobium ilicifolium	ON594336	ON594591	KX792893
Polymeria_calycina	Polymeria calycina	KC529317		KC529163
Pomaderris_argyrophylla	Pomaderris argyrophylla	ON594337	ON594592	ON614979
Pomax_umbellata	Pomax umbellata	ON594338	ON594593	ON614980
Poranthera_microphylla	Poranthera microphylla	AY663612		AM745887
Pseudanthus_ligulataus	Pseudanthus ligulataus	ON594340	ON594595
Pseudanthus_orientalis	Pseudanthus orientalis	ON594341	ON594596
Psychotria_loniceroides	Psychotria loniceroides	ON594342	ON594597	KM894504
Ptilothrix_deusta	Ptilothrix deusta	ON594343	ON594598
Pultenaea_myrtoides	Pultenaea myrtoides	MHFRI027*	ON594600
Pultenaea_robusta	Pultenaea robusta	ON594345	ON594601	ON614983
Pultenaea_villosa	Pultenaea villosa	ON594346	ON594602	ON614984
Rhynchospora_rubra	Rhynchospora rubra	ON594347		JQ589540
Ricinocarpos_pinifolius	Ricinocarpos pinifolius	ON594348		AB268053
Rubus_parvifolius	Rubus parvifolius	KX678976		KX677532
Rutidosis_murchisonii	Rutidosis murchisonii	ON594349	ON594603
Schoenoplectus"pithy sedge"	Schoenoplectus"pithy sedge"	GQ130365		FR832833
Schoenus_apogon	Schoenus apogon	ON594350	ON594604
Schoenus_brevifolius	Schoenus brevifolius	ON594351	ON594605
Schoenus_lepidosperma	Schoenus lepidosperma	ON594353	ON594606
Schoenus_ornithopodioides	Schoenus ornithopodioides	ON594354	ON594607
Schoenus_paludosus	Schoenus paludosus	ON594131	ON594419
Schoenus_scabripes	Schoenus scabripes	ON594355	ON594608
Schoenus_sparteus	Schoenus sparteus	ON594356	ON594609
Schoenus_vaginatus	Schoenus vaginatus	ON594357	ON594610
Scleria mackaviensis	Scleria mackaviensis	JQ591303		JQ587380
Sowerbaea_juncea	Sowerbaea juncea	ON594359	ON594611	GBVW3592
Sphaeromorphaea_australis	Sphaeromorphaea australis	ON594360	LN607260	AY143606
Sporadanthus_caudatus	Sporadanthus caudatus		ON594612	ON614985
Spordanthus_interruptus	Spordanthus interruptus	ON594361	ON594613	ON614986
Sprengelia_sprengelioides	Sprengelia sprengelioides	ON594362	ON594614
Stackhousia_nuda	Stackhousia nuda	ON594363	ON594615	ON614987
Strangea_linearis	Strangea linearis	ON594364	ON594616
Stylidium_graminifolium	Stylidium graminifolium	ON594365	ON594617
Stylidium_ornatum	Stylidium ornatum	ON594366	ON594618
Styphelia_viridis	Styphelia viridis	ON594367	ON594619	AY005105
Tetratheca_thymifolia	Tetratheca thymifolia	ON594368
Themeda_triandra	Themeda triandra	ON594369	ON594620	LN906787
Thysanotus_tuberosus	Thysanotus tuberosus	ON594370	ON594621	ON614989
Trachymene_incisa	Trachymene incisa	ON594371	ON594622	ON614990
Tricoryne_elatior	Tricoryne elatior	ON594372		JX903619
Triplarina_volcanica	Triplarina volcanica	ON594139		AF489393
Tripogon_loliiformis	Tripogon loliiformis	ON594373	ON594623
Utricularia_lateriflora	Utricularia lateriflora	ON594374	ON594624
Velleia_spathulata	Velleia spathulata	ON594375	ON594625	ON614991
Viminaria_juncea	Viminaria juncea	ON594376	ON594626	ON614992
Westringia tenuicaulis	Westringia tenuicaulis	ON594377	ON594627	ON614993
Wikstroemia_indica	Wikstroemia indica	KM895779	KM895178	KM894856
Woollsia_pungens	Woollsia pungens	ON594378	ON594628
Wurmbea_dioica	Wurmbea dioica	KC796885		KC796936
Xanthorrhoea_fulva	Xanthorrhoea fulva	ON594379	ON594629	ON614994
Xanthorrhoea_johnsonii	Xanthorrhoea johnsonii	ON594380		ON614995
Xanthorrhoea_latifolia	Xanthorrhoea latifolia	ON594381	ON594630	ON614996
Xanthosia_pilosa	Xanthosia pilosa	ON594383	ON594632	ON614997
Xyris_complanata	Xyris complanata	ON594384	ON594633
Xyris_juncea	Xyris juncea	ON594385	ON594633
Zieria_laxiflora	Zieria laxiflora	ON594386	ON594634
Zieria_minutiflora	Zieria minutiflora	KM895516	KM895018	KM894436
Zieria_smithii	Zieria smithii	KM896136	KM895382	KM894941
